# Supplementary material for: The genomic impact of historical hybridization with massive mitochondrial DNA introgression
Source: Genome Biol. 2018 Jul 30;19:91. doi: 10.1186/s13059-018-1471-8 (PMC6065068; doi:10.1186/s13059-018-1471-8)
Supplement: Supplementary file 1 — Table S1. Basic information of specimens sequenced in this study. Table S2. ELAI’s Power for inferring introgression according to our simulations of artificial introgression. Table S3. Demographic inferences from IBS tracts. Table S4. List of nuclear genes overlapping regions with outlier introgression frequencies. Table S5. Gene Ontology functional enrichment analyses of genes overlapping regions with outlier frequencies of introgression. Table S6. Summary of GO functional categories significantly enriched in the set of genes with outlier introgression frequencies. Table S7. Nonsynonymous mutations detected within 123 high frequency introgression genes and their potential functional impact inferred using SIFT. Table S8. List of mitonuc genes with outlier frequencies of introgression. Table S9. List of mitonuc genes with geographic patterns similar to that of mtDNA. Table S10. Nonsynonymous mutations detected within mitonuc gene candidates to have co-introgressed with mitochondrial. Table S11. Classification of chromosomes according to centromere position. (XLSX 58 kb) [file 13059_2018_1471_MOESM1_ESM.xlsx]

## Sheet: Table S1
Table S1. Sampling localities, tissue used for genomic DNA extraction and conservation method, mitochondrial DNA lineage and raw sequencing coverage of specimens sequenced in this study.
Species	Individual code	Population Code	Locality	Latitude	Longitude	Tissue	Conservation	Year	mtDNA haplotypea	Raw Coverage (X)	SRA Accession Number
Lepus granatensis
LGR.3085		ALT	Alcoutim, Portugal	37.47	-7.47308	Ear	Ethanol	2012	nat	26.9	SRX3108381
LGR.1163		SEV	Seville, Spain	37.3891	-5.98446	Ear	Ethanol	2012	nat	25.5	SRX3108380
LGR.2018		PAN	Pancas, Portugal	38.8091	-8.91893	Kidney	RNAlater	2009	nat	22.8	SRX3108383
LGR.147		CBR	Castelo Branco, Portugal	39.9248	-7.24159	Organ	Frozen	2000	nat	26.2	SRX3108382
LGR.2553		CRE	Ciudad Real, Spain	38.9848	-3.92738	Kidney	RNAlater	2011	nat	25.6	SRX3108379
LGR.2786		VLP	Valpaços, Portugal	41.6087	-7.31091	Kidney	RNAlater	2012	iC	27.6	SRX3108378
LGR.1028		MAD	Madrid, Spain	40.4168	-3.70379	Ear	Ethanol	2002	iA	28.7	SRX3108389
LGR.1294		VAL	Valencia, Spain	39.4699	-0.376288	Ear	Ethanol	2002	iB	23.2	SRX3108388
LGR.1184		SOR	Soria, Spain	41.7644	-2.46377	Ear	Ethanol	2003	iB	23.3	SRX3108391
LGR.2544		NAV	Navarra, Spain	42.6954	-1.67607	Kidney	RNAlater	2001	iA	27.7	SRX3108390
Lepus timidus
LTM.2012		FSCA	Fennoscandia	-	-	Kidney	RNAlater	2009	-	23.2	SRX3108384
LTM.3121		ALP	Switzerland, Alps	46.8416	9.59486	Kidney	RNAlater	2012	-	25.1	SRX3108387
LTM.3109		ALP	France, Alps	46.0431	6.57907	Ear	Ethanol	2012	-	28.5	SRX3108386
Lepus americanus
LAM.2013		MON	Montana, USA	47.0402	-113.555	Ovarian	RNAlater	2009	-	27.6	SRX3108385
										(37.4b)	SRX265626
amtDNA lineages were inferred based on a fragment of the D-loop control region and follow the notation of Melo-Ferreira et al. (2011, Evolution 65, 1956-1968); nat: of L. granatensis (native) origin; iA, iB, iC: three sublineages of L. timidus origin.
bIncluding data from Carneiro et al. (2014, Science 345, 1074-1079).

## Sheet: Table S2
Table S2. ELAI’s Power for inferring introgression according to our simulations of artificial introgression. For each fragment size, the power of detection of introgression is expressed as the proportion among the 1000 artificially introgressed fragments (across 5 independent simulations of 200 introgressed fragments) detected as introgressed by ELAI. An artificially introgressed fragment was con…
Introgressed Window Size	Power (%)
10kb	0.188
30kb	0.714
50kb	0.912

## Sheet: Table S3
Table S3. Demographic Inferences from IBS tracts. Four demographic models were tested, all based on a simple model of divergence from an ancestral population. Other demographic events included: 1P - one admixture pulse from L. timidus into L. granatensis; 1PC - one admixture pulse with size change in both populations at time of admixture; 4P - four admixture pulses; 4PC - four admixture pulses wi…
Model parameters	IBS tracts > 300 bp					IBS tracts > 10 kb
	1P	1PC	4P	4PC		1P	1PC	4P	4PC
Negative log likelihood	14871204	14838966	5581353	5336008		55528	55379	55434	55276
Divergence time (kya)	463.6	464	451.1	479.1		518	532.2	531.1	743.4
Time of ancient bottleneck	-	-	-	-		-	-	-	-
Time of most ancient gene flow (kya)	-	-	51.1	79.1		-	-	21.6	24.6
Time of most recent gene flow (kya)	63.6	64	50.8	58.9		2	4.9	21.3	24.3
L. granatensis population size (ancient)	-	43559	-	44236		-	18789	-	10000
L. granatensis population size (current)	40080	39460	35185	35735		37881	256872	37950	38007
L. timidus population size (ancient)	-	43691	-	50000		-	66744	-	10000
L. timidus population size (current)	38222	37888	56020	22829		45496	37762	45283	45743
Ancestral population size	10000	10000	10000	10000		373491	653271	737827	416232

## Sheet: Table S4
Table S4. List of nuclear genes overlapping regions with outlier introgression frequencies (>= 85%).
Introgression Frequency	Ensembl Gene ID	Associated Gene Code	Description
1	ENSOCUG00000000064	DNAJB6	DnaJ heat shock protein family (Hsp40) member B6
1	ENSOCUG00000000323	NUP188	nucleoporin 188
1	ENSOCUG00000001270	VAMP7	vesicle associated membrane protein 7
1	ENSOCUG00000001402	FNTA	-
1	ENSOCUG00000002022	RAB3GAP1	RAB3 GTPase activating protein catalytic subunit 1
1	ENSOCUG00000003708	-	-
1	ENSOCUG00000004871	RARS2	arginyl-tRNA synthetase 2, mitochondrial
1	ENSOCUG00000005079	-	-
1	ENSOCUG00000005804	RBL1	RB transcriptional corepressor like 1
1	ENSOCUG00000005948	DMXL2	Dmx like 2
1	ENSOCUG00000005958	ATRNL1	attractin like 1
1	ENSOCUG00000006052	SOS2	SOS Ras/Rho guanine nucleotide exchange factor 2
1	ENSOCUG00000006224	ALMS1	ALMS1, centrosome and basal body associated protein
1	ENSOCUG00000006605	ARID4B	AT-rich interaction domain 4B
1	ENSOCUG00000007181	-	-
1	ENSOCUG00000008572	RBPMS	RNA binding protein with multiple splicing
1	ENSOCUG00000008669	TMLHE	trimethyllysine hydroxylase, epsilon
1	ENSOCUG00000008704	SPATA6	spermatogenesis associated 6
1	ENSOCUG00000009937	SLC9C1	solute carrier family 9 member C1
1	ENSOCUG00000010045	ZNF638	zinc finger protein 638
1	ENSOCUG00000011118	-	-
1	ENSOCUG00000011569	GLRA2	glycine receptor alpha 2
1	ENSOCUG00000011572	-	-
1	ENSOCUG00000011774	FBXL5	F-box and leucine rich repeat protein 5
1	ENSOCUG00000011808	STARD13	StAR related lipid transfer domain containing 13
1	ENSOCUG00000012104	ADAM7	ADAM metallopeptidase domain 7
1	ENSOCUG00000012315	RNF168	ring finger protein 168
1	ENSOCUG00000013358	-	-
1	ENSOCUG00000013380	ADAM9	ADAM metallopeptidase domain 9
1	ENSOCUG00000013397	-	-
1	ENSOCUG00000013788	-	-
1	ENSOCUG00000014811	KIAA1109	KIAA1109
1	ENSOCUG00000014825	-	-
1	ENSOCUG00000015577	C3orf20	chromosome 3 open reading frame 20
1	ENSOCUG00000015808	GMCL1	germ cell-less, spermatogenesis associated 1
1	ENSOCUG00000016322	IL12B	interleukin 12B
1	ENSOCUG00000016382	ZNF106	zinc finger protein 106
1	ENSOCUG00000016532	ATP13A3	ATPase 13A3
1	ENSOCUG00000016756	NEK1	NIMA related kinase 1
1	ENSOCUG00000017435	RIF1	replication timing regulatory factor 1
1	ENSOCUG00000017527	LRRIQ1	leucine rich repeats and IQ motif containing 1
1	ENSOCUG00000017627	UGGT2	UDP-glucose glycoprotein glucosyltransferase 2
1	ENSOCUG00000017859	RBM46	RNA binding motif protein 46
1	ENSOCUG00000018195	-	-
1	ENSOCUG00000019104	-	-
1	ENSOCUG00000020014	-	-
1	ENSOCUG00000020052	-	-
1	ENSOCUG00000020561	-	-
1	ENSOCUG00000021795	-	-
1	ENSOCUG00000021956	-	-
1	ENSOCUG00000022218	SPRY3	sprouty RTK signaling antagonist 3
1	ENSOCUG00000022616	-	-
1	ENSOCUG00000024224	-	-
1	ENSOCUG00000024280	TMEM5	transmembrane protein 5
1	ENSOCUG00000024354	-	-
1	ENSOCUG00000025062	SDHAF4	succinate dehydrogenase complex assembly factor 4
1	ENSOCUG00000025461	-	-
1	ENSOCUG00000027756	-	-
1	ENSOCUG00000027897	-	-
1	ENSOCUG00000027911	-	-
1	ENSOCUG00000028219	FASLG	Fas ligand
1	ENSOCUG00000028725	-	-
1	ENSOCUG00000028980	-	-
1	ENSOCUG00000029249	LOC100340453	-
1	ENSOCUG00000029319	-	-
1	ENSOCUG00000029499	CWC27	CWC27 spliceosome associated protein homolog
1	ENSOCUG00000029585	ZNF584	zinc finger protein 584
0.95	ENSOCUG00000000397	KALRN	-
0.95	ENSOCUG00000002212	TIPIN	TIMELESS interacting protein
0.95	ENSOCUG00000007258	STRN	striatin
0.95	ENSOCUG00000007754	CAMSAP2	calmodulin regulated spectrin associated protein family member 2
0.95	ENSOCUG00000008782	MAP2K1	dual specificity mitogen-activated protein kinase kinase 1
0.95	ENSOCUG00000010614	ATAD2	ATPase family, AAA domain containing 2
0.95	ENSOCUG00000012757	NUP205	nucleoporin 205
0.95	ENSOCUG00000013917	C4H12orf55	-
0.95	ENSOCUG00000015796	ANXA4	annexin A4
0.95	ENSOCUG00000015849	-	-
0.95	ENSOCUG00000016222	TXLNB	taxilin beta
0.95	ENSOCUG00000017001	KANSL1L	KAT8 regulatory NSL complex subunit 1 like
0.95	ENSOCUG00000017266	FAM168B	family with sequence similarity 168 member B
0.95	ENSOCUG00000023033	-	-
0.95	ENSOCUG00000025652	LOC100355582	-
0.95	ENSOCUG00000026715	ERLIN1	ER lipid raft associated 1
0.9	ENSOCUG00000000334	TOX4	TOX high mobility group box family member 4
0.9	ENSOCUG00000000336	METTL3	methyltransferase like 3
0.9	ENSOCUG00000001397	LMF2	lipase maturation factor 2
0.9	ENSOCUG00000001401	NCAPH2	non-SMC condensin II complex subunit H2
0.9	ENSOCUG00000001408	TYMP	thymidine phosphorylase
0.9	ENSOCUG00000002156	PATL1	PAT1 homolog 1, processing body mRNA decay factor
0.9	ENSOCUG00000004218	CD14	CD14 molecule
0.9	ENSOCUG00000004236	TMCO6	transmembrane and coiled-coil domains 6
0.9	ENSOCUG00000004657	NR2C1	nuclear receptor subfamily 2 group C member 1
0.9	ENSOCUG00000006543	FAM169A	family with sequence similarity 169 member A
0.9	ENSOCUG00000006794	OPTN	optineurin
0.9	ENSOCUG00000007815	LOC100337847	-
0.9	ENSOCUG00000011422	L2HGDH	L-2-hydroxyglutarate dehydrogenase
0.9	ENSOCUG00000012252	DPP6	dipeptidyl peptidase like 6
0.9	ENSOCUG00000012915	SIK2	salt inducible kinase 2
0.9	ENSOCUG00000021766	-	-
0.9	ENSOCUG00000023678	-	-
0.9	ENSOCUG00000024805	COL28A1	collagen type XXVIII alpha 1 chain
0.9	ENSOCUG00000025155	-	-
0.9	ENSOCUG00000026117	-	-
0.9	ENSOCUG00000026317	-	-
0.9	ENSOCUG00000026983	-	-
0.9	ENSOCUG00000027464	SALL2	spalt like transcription factor 2
0.9	ENSOCUG00000027602	-	-
0.9	ENSOCUG00000028610	-	-
0.9	ENSOCUG00000029177	LOC100338099	-
0.9	ENSOCUG00000029651	LOC100351290	-
0.85	ENSOCUG00000001172	CCDC138	coiled-coil domain containing 138
0.85	ENSOCUG00000002694	KPNA1	karyopherin subunit alpha 1
0.85	ENSOCUG00000003372	ART3	ADP-ribosyltransferase 3
0.85	ENSOCUG00000004519	ERCC8	ERCC excision repair 8, CSA ubiquitin ligase complex subunit
0.85	ENSOCUG00000006203	DUSP27	dual specificity phosphatase 27 (putative)
0.85	ENSOCUG00000008904	RNASEH2B	ribonuclease H2 subunit B
0.85	ENSOCUG00000011270	CD1B	T-cell surface glycoprotein CD1b precursor
0.85	ENSOCUG00000011880	SPIN1	-
0.85	ENSOCUG00000014615	MSH6	mutS homolog 6
0.85	ENSOCUG00000014631	FBXO11	F-box protein 11
0.85	ENSOCUG00000014849	CACNB2	voltage-dependent L-type calcium channel subunit beta-2
0.85	ENSOCUG00000025553	-	-
0.85	ENSOCUG00000029524	FAM227B	family with sequence similarity 227 member B

## Sheet: Table S5
Table S5. Gene Ontology Functional enrichment analyses of genes overlapping regions with outlier frequencies of introgression (>= 85%). Evidence for RND 10kb, 20kb and 50kb window size analyses were combined. Rabbit and Mouse Ensemble IDs (only one2one orthologues were considered) were used in this analysis. Corrected p-values were obtained using the Benjamini-Hochberg multiple testing correction…
GO Term Reference Species	GO Term	Term Description	corrected -value	Nb. Genes in Term	Nb. Genes in Query	Intersection Term/Query
Rabbit
	GO:0048172	regulation of short-term neuronal synaptic plasticity	0.045	6	123	1
	GO:0061734	parkin-mediated mitophagy in response to mitochondrial depolarization	0.038	5	123	1
	GO:0016236	Macroautophagy	0.049	107	123	3
	GO:0007033	vacuole organization	0.043	101	123	3
	GO:0035196	production of miRNAs involved in gene silencing by miRNA	0.012	22	123	2
	GO:0051547	regulation of keratinocyte migration	0.045	6	123	1
	GO:0000076	DNA replication checkpoint	0.045	6	123	1
	GO:0045739	positive regulation of DNA repair	0.022	30	123	2
	GO:2000618	regulation of histone H4-K16 acetylation	0.038	5	123	1
	GO:0051095	regulation of helicase activity	0.038	5	123	1
	GO:0006283	transcription-coupled nucleotide-excision repair	0.045	6	123	1
	GO:0051608	histamine transport	0.038	5	123	1
	GO:0086027	AV node cell to bundle of His cell signaling	0.045	6	123	1
	GO:0018410	C-terminal protein amino acid modification	0.045	6	123	1
	GO:0051135	positive regulation of NK T cell activation	0.038	5	123	1
	GO:0080009	mRNA methylation	0.045	6	123	1
	GO:0071361	cellular response to ethanol	0.045	6	123	1
	GO:0050829	defense response to Gram-negative bacterium	0.014	24	123	2
	GO:0072594	establishment of protein localization to organelle	0.045	337	123	6
	GO:0043001	Golgi to plasma membrane protein transport	0.008	18	123	2
	GO:0002705	positive regulation of leukocyte mediated immunity	0.015	68	123	3
	GO:0008333	endosome to lysosome transport	0.024	31	123	2
	GO:0001956	positive regulation of neurotransmitter secretion	0.038	5	123	1
	GO:0060440	trachea formation	0.045	6	123	1
	GO:0042976	activation of Janus kinase activity	0.045	6	123	1
	GO:0097527	necroptotic signaling pathway	0.038	5	123	1
	GO:0009411	response to UV	0.003	81	123	4
	GO:0090051	negative regulation of cell migration involved in sprouting angiogenesis	0.045	6	123	1
	GO:0034454	microtubule anchoring at centrosome	0.045	6	123	1
	GO:0042267	natural killer cell mediated cytotoxicity	0.024	31	123	2
	GO:0032819	positive regulation of natural killer cell proliferation	0.045	6	123	1
	GO:0002285	lymphocyte activation involved in immune response	0.044	102	123	3
	GO:0050765	negative regulation of phagocytosis	0.038	5	123	1
	GO:0030101	natural killer cell activation	0.028	34	123	2
	GO:0034773	histone H4-K20 trimethylation	0.038	5	123	1
	GO:0009437	carnitine metabolic process	0.045	6	123	1
	GO:0000045	autophagosome assembly	0.049	46	123	2
	GO:0071500	cellular response to nitrosative stress	0.045	6	123	1
	GO:0070257	positive regulation of mucus secretion	0.038	5	123	1
	GO:0034393	positive regulation of smooth muscle cell apoptotic process	0.038	5	123	1
	GO:0032760	positive regulation of tumor necrosis factor production	0.029	35	123	2
	GO:0048840	otolith development	0.045	6	123	1
	GO:0070339	response to bacterial lipopeptide	0.038	5	123	1
	GO:0046666	retinal cell programmed cell death	0.038	5	123	1
	GO:0051957	positive regulation of amino acid transport	0.038	5	123	1
	GO:0001866	NK T cell proliferation	0.045	6	123	1
	GO:0060324	face development	0.036	39	123	2
	GO:0008380	RNA splicing	0.04	167	123	4
Mouse
	GO:0007528	neuromuscular junction development	0.003	37	88	3
	GO:0046578	regulation of Ras protein signal transduction	0.05	177	88	4
	GO:0002449	lymphocyte mediated immunity	0.029	150	88	4
	GO:0007283	spermatogenesis	0.013	349	88	7
	GO:0002705	positive regulation of leukocyte mediated immunity	0.025	77	88	3
	GO:0002230	positive regulation of defense response to virus by host	0.009	16	88	2
	GO:0002697	regulation of immune effector process	0.024	219	88	5
	GO:0009411	response to UV	0.001	97	88	5
	GO:0002204	somatic recombination of immunoglobulin genes involved in immune response	0.042	36	88	2
	GO:1902580	single-organism cellular localization	0.001	744	88	13
	GO:0002323	natural killer cell activation involved in immune response	0.006	13	88	2
	GO:0071359	cellular response to dsRNA	0.004	41	88	3
	GO:0043984	histone H4-K16 acetylation	0.011	18	88	2
	GO:0050829	defense response to Gram-negative bacterium	0.034	32	88	2
	GO:0045739	positive regulation of DNA repair	0.04	35	88	2
	GO:2000001	regulation of DNA damage checkpoint	0.008	15	88	2
	GO:0050775	positive regulation of dendrite morphogenesis	0.021	25	88	2

## Sheet: Table S6
Table S6. Summary of GO functional categories significantly enriched in the set of genes with outlier introgression frequencies (at least 85%). Redundant terms were removed using REVIGO.
GO Term Reference Species	Representative Term
Rabbit
	positive regulation of leukocyte mediated immunity
	response to UV
	Golgi to plasma membrane protein transport
	mRNA methylation
	macroautophagy
	face development
	carnitine metabolism
Mouse
	response to UV
	single-organism cellular localization
	neuromuscular junction development
	spermatogenesis

## Sheet: Table S7
Table S7. Nonsynonymous mutations detected within 123 high frequency introgression genes and their potential functional impact inferred using SIFT. ‡Gene names were obtained from the ortholog gene in the mouse when gene names not available in the rabbit annotation. *Low confidence in this prediction due to low sequence diversity.
Gene Name	Ensembl ID	Aminoacid Mutation	Nb. sequences at pos.	Median sequence conservation	Score	Effect
-	ENSOCUG00000000064	S>P	78	3.07	1	Tolerated
-	ENSOCUG00000000064	S>G	74	3.14	0.43	Tolerated
METTL3	ENSOCUG00000000336	S>T	14	3.52	1	Tolerated
METTL3	ENSOCUG00000000336	A>V	15	3.53	0.29	Tolerated
METTL3	ENSOCUG00000000336	S>T	6	3.46	0.63	Tolerated
KALRN	ENSOCUG00000000397	I>T	60	3.7	0.49	Tolerated
CCDC138	ENSOCUG00000001172	D>E	44	2.85	1	Tolerated
LMF2	ENSOCUG00000001172	S>N	44	2.79	1	Tolerated
LMF2	ENSOCUG00000001397	T>A	43	3.11	0.44	Tolerated
NCAPH2	ENSOCUG00000001401	E>D	36	2.54	0.35	Tolerated
NCAPH2	ENSOCUG00000001401	H>P	36	2.43	0.35	Tolerated
NCAPH2	ENSOCUG00000001401	N>T	35	2.56	1	Tolerated
NCAPH2	ENSOCUG00000001401	A>T	34	2.72	0.75	Tolerated
HOOK3	ENSOCUG00000001402	T>S	95	3.52	1	Tolerated
TIPIN	ENSOCUG00000002212	P>L	41	2.76	0.01	Potentially Functional
TIPIN	ENSOCUG00000002212	A>T	43	2.63	0.41	Tolerated
ART3	ENSOCUG00000003372	R>K	41	2.91	1	Tolerated
ART3	ENSOCUG00000003372	L>P	41	2.91	0.3	Potentially Functional
ART3	ENSOCUG00000003372	P>R	32	2.94	0	Tolerated
ART3	ENSOCUG00000003372	V>M	28	3.23	1	Tolerated
1700007G11Rik‡	ENSOCUG00000003708	T>S	24	3.35	0.37	Tolerated
CD14	ENSOCUG00000004218	P>R	20	2.63	0.36	Tolerated
CD14	ENSOCUG00000004218	Q>P	17	2.97	0.56	Tolerated
CD14	ENSOCUG00000004218	P>L	20	2.63	0.68	Tolerated
CD14	ENSOCUG00000004218	S>T	18	2.7	0.98	Tolerated
TMCO6	ENSOCUG00000004236	A>V	41	3.01	0.37	Tolerated
TMCO6	ENSOCUG00000004236	C>R	39	3.07	0.38	Tolerated
RARS2	ENSOCUG00000004871	G>S	25	3.38	0.75	Tolerated
RARS2	ENSOCUG00000004871	I>V	31	3.23	1	Tolerated
RARS2	ENSOCUG00000004871	E>D	28	3.21	0.51	Tolerated
RARS2	ENSOCUG00000004871	W>L	27	3.22	0.23	Tolerated
Cep76‡	ENSOCUG00000005079	S>N	72	3.59	0.32	Tolerated
Cep76‡	ENSOCUG00000005079	A>T	1	4.32	0	Potentially Functional*
Cep76‡	ENSOCUG00000005079	T>A	74	3.59	0.02	Potentially Functional*
RBL1	ENSOCUG00000005804	V>I	65	2.93	0.45	Tolerated
RBL1	ENSOCUG00000005804	A>T	68	2.89	0.65	Tolerated
RBL1	ENSOCUG00000005804	V>I	72	2.9	0.53	Tolerated
RBL1	ENSOCUG00000005804	R>Q	64	2.93	0.23	Tolerated
RBL1	ENSOCUG00000005804	I>N	71	2.89	0.41	Tolerated
DMXL2	ENSOCUG00000005948	S>P	1	4.32	0	Potentially Functional*
ATRNL1	ENSOCUG00000005958	V>A	67	3.11	0.29	Tolerated
SOS2	ENSOCUG00000006052	H>Y	64	3.72	1	Tolerated
SOS2	ENSOCUG00000006052	K>R	66	3.61	0.08	Tolerated
DUSP27	ENSOCUG00000006203	Q>R	39	3.43	0.86	Tolerated
DUSP27	ENSOCUG00000006203	C>S	39	3.12	1	Tolerated
ALMS1	ENSOCUG00000006224	V>I	16	3.63	1	Tolerated
ALMS1	ENSOCUG00000006224	P>L	27	3.16	1	Tolerated
ALMS1	ENSOCUG00000006224	V>F	26	3.39	0.02	Potentially Functional*
ALMS1	ENSOCUG00000006224	T>I	1	4.32	0	Potentially Functional*
ALMS1	ENSOCUG00000006224	S>L	21	3.25	1	Tolerated
ALMS1	ENSOCUG00000006224	Q>R	21	3.48	0.72	Tolerated
ALMS1	ENSOCUG00000006224	V>I	21	3.48	0.22	Tolerated
ALMS1	ENSOCUG00000006224	E>A	28	3.17	0.02	Potentially Functional
ALMS1	ENSOCUG00000006224	Y>C	27	3.19	0.17	Tolerated
ALMS1	ENSOCUG00000006224	T>K	28	3.17	1	Tolerated
ALMS1	ENSOCUG00000006224	E>K	28	3.17	0.17	Tolerated
ALMS1	ENSOCUG00000006224	Q>R	27	3.19	0.03	Potentially Functional
ALMS1	ENSOCUG00000006224	V>I	18	3.53	0.7	Tolerated
ALMS1	ENSOCUG00000006224	S>P	17	3.59	1	Tolerated
ALMS1	ENSOCUG00000006224	L>F	21	3.48	0.04	Potentially Functional*
ALMS1	ENSOCUG00000006224	V>A	21	3.48	1	Tolerated
ALMS1	ENSOCUG00000006224	S>T	21	3.49	0.42	Tolerated
ALMS1	ENSOCUG00000006224	A>T	21	3.49	1	Tolerated
ALMS1	ENSOCUG00000006224	A>D	24	3.19	0.77	Tolerated
ALMS1	ENSOCUG00000006224	S>P	18	3.21	0.18	Tolerated
ALMS1	ENSOCUG00000006224	Q>R	22	3.25	0.01	Potentially Functional
ALMS1	ENSOCUG00000006224	G>D	22	3.25	1	Tolerated
ALMS1	ENSOCUG00000006224	K>E	22	3.25	0.13	Tolerated
ALMS1	ENSOCUG00000006224	Q>P	22	3.19	0.26	Tolerated
ALMS1	ENSOCUG00000006224	G>R	15	3.7	0.19	Tolerated
ALMS1	ENSOCUG00000006224	H>R	24	3.39	0.2	Tolerated
ALMS1	ENSOCUG00000006224	V>G	28	3.16	0.53	Tolerated
ALMS1	ENSOCUG00000006224	S>T	22	3.47	0.06	Tolerated
ALMS1	ENSOCUG00000006224	N>D	27	3.38	0.01	Potentially Functional*
ALMS1	ENSOCUG00000006224	V>I	27	3.17	0.4	Tolerated
ALMS1	ENSOCUG00000006224	I>V	27	3.17	0.15	Tolerated
ALMS1	ENSOCUG00000006224	L>F	27	3.17	0.24	Tolerated
ALMS1	ENSOCUG00000006224	R>G	27	3.15	0.15	Tolerated
ALMS1	ENSOCUG00000006224	K>R	27	3.15	0.05	Potentially Functional
ALMS1	ENSOCUG00000006224	A>T	28	3.16	0.31	Tolerated
ALMS1	ENSOCUG00000006224	L>V	29	3.16	0.43	Tolerated
ALMS1	ENSOCUG00000006224	T>A	23	3.24	0.45	Tolerated
ALMS1	ENSOCUG00000006224	F>C	24	3.28	0.23	Tolerated
ALMS1	ENSOCUG00000006224	F>L	28	3.15	0.43	Tolerated
ALMS1	ENSOCUG00000006224	E>G	28	3.15	1	Tolerated
ALMS1	ENSOCUG00000006224	L>P	28	3.18	1	Tolerated
ALMS1	ENSOCUG00000006224	E>G	28	3.18	0.12	Tolerated
ALMS1	ENSOCUG00000006224	G>S	28	3.2	0.12	Tolerated
ALMS1	ENSOCUG00000006224	A>G	22	3.34	0.34	Tolerated
ALMS1	ENSOCUG00000006224	P>S	26	3.28	0.22	Tolerated
ALMS1	ENSOCUG00000006224	E>K	26	3.28	1	Tolerated
ALMS1	ENSOCUG00000006224	V>F	26	3.27	1	Tolerated
ALMS1	ENSOCUG00000006224	L>P	26	3.27	0.3	Tolerated
ALMS1	ENSOCUG00000006224	A>G	26	3.27	0.23	Tolerated
ALMS1	ENSOCUG00000006224	H>Q	27	3.27	1	Tolerated
FAM169A	ENSOCUG00000006543	V>A	25	3.05	0.07	Tolerated
FAM169A	ENSOCUG00000006543	G>C	26	2.98	0	Potentially Functional
ARID4B	ENSOCUG00000006605	N>S	69	2.69	0.42	Tolerated
ARID4B	ENSOCUG00000006794	L>F	49	2.97	0.05	Tolerated
OPTN	ENSOCUG00000006794	T>K	48	2.98	1	Tolerated
OPTN	ENSOCUG00000006794	S>P	48	2.94	0.36	Tolerated
OPTN	ENSOCUG00000006794	V>A	35	3.31	0.88	Tolerated
OPTN	ENSOCUG00000006794	D>F	48	2.9	0	Potentially Functional
Gdpd4‡	ENSOCUG00000007181	E>K	138	2.11	0.48	Tolerated
Gdpd4‡	ENSOCUG00000007181	T>M	139	2.13	0.01	Potentially Functional
Gdpd4‡	ENSOCUG00000007181	V>A	111	2.28	0.88	Tolerated
STRN	ENSOCUG00000007258	N>S	97	3.17	1	Tolerated
CAMSAP2	ENSOCUG00000007754	V>I	12	3.54	0.18	Tolerated
CAMSAP2	ENSOCUG00000007754	T>A	9	3.7	0.6	Tolerated
CAMSAP2	ENSOCUG00000007754	A>P	11	3.58	0.34	Tolerated
TMLHE	ENSOCUG00000008669	K>M	28	3.07	0.04	Potentially Functional
TMLHE	ENSOCUG00000008669	I>V	28	2.97	0.89	Tolerated
RNASEH2B	ENSOCUG00000008904	I>V	35	3.15	1	Tolerated
RNASEH2B	ENSOCUG00000008904	Q>K	40	3.06	1	Tolerated
SLC9C1	ENSOCUG00000009937	T>P	38	2.68	0.21	Tolerated
SLC9C1	ENSOCUG00000009937	Q>H	40	2.61	0.16	Tolerated
SLC9C1	ENSOCUG00000009937	N>S	41	2.56	1	Tolerated
SLC9C1	ENSOCUG00000009937	M>V	42	2.57	1	Tolerated
SLC9C1	ENSOCUG00000009937	N>T	44	2.56	0.88	Tolerated
SLC9C1	ENSOCUG00000009937	N>S	19	3.18	0.91	Tolerated
ZNF638	ENSOCUG00000010045	D>E	33	3.07	0.06	Tolerated
ZNF638	ENSOCUG00000010045	I>V	34	2.95	1	Tolerated
ZNF638	ENSOCUG00000010045	P>S	33	2.97	1	Tolerated
ZNF638	ENSOCUG00000010045	K>R	33	2.97	0.19	Tolerated
ZNF638	ENSOCUG00000010045	T>K	34	2.97	1	Tolerated
ZNF638	ENSOCUG00000010045	N>S	35	2.97	1	Tolerated
ZNF638	ENSOCUG00000010045	S>T	31	3.62	0.62	Tolerated
ZNF638	ENSOCUG00000010045	M>T	31	3.09	0.42	Tolerated
ZNF638	ENSOCUG00000010045	P>L	31	3.1	0.11	Tolerated
ATAD2	ENSOCUG00000010614	G>R	60	2.81	0.35	Tolerated
ATAD2	ENSOCUG00000010614	G>S	14	3.88	0.85	Tolerated
ATAD2	ENSOCUG00000010614	H>Q	41	3.34	0.03	Potentially Functional*
ATAD2	ENSOCUG00000010614	I>V	66	2.81	0.01	Potentially Functional
ATAD2	ENSOCUG00000010614	T>I	66	2.81	1	Tolerated
-	ENSOCUG00000011270	E>D	103	2.72	0.54	Tolerated
GLRA2	ENSOCUG00000011569	P>S	51	3.79	0.56	Tolerated
GLRA2	ENSOCUG00000011569	P>S	108	3.72	0	Potentially Functional*
GLRA2	ENSOCUG00000011569	Q>K	107	3.72	1	Tolerated
GLRA2	ENSOCUG00000011569	D>E	105	3.81	1	Tolerated
ADAM7	ENSOCUG00000012104	A>G	138	1.96	0.11	Tolerated
ADAM7	ENSOCUG00000012104	T>M	55	2.64	0.02	Potentially Functional
ADAM7	ENSOCUG00000012104	A>T	37	2.71	0.36	Tolerated
ADAM7	ENSOCUG00000012104	R>H	258	1.83	0.07	Tolerated
ADAM7	ENSOCUG00000012104	V>M	269	1.8	0.09	Tolerated
ADAM7	ENSOCUG00000012104	R>K	265	1.82	1	Tolerated
ADAM7	ENSOCUG00000012104	S>Y	271	1.82	0.29	Tolerated
ADAM7	ENSOCUG00000012104	K>T	271	1.82	0.31	Tolerated
ADAM7	ENSOCUG00000012104	P>A	269	1.83	0.24	Tolerated
ADAM7	ENSOCUG00000012104	Q>K	271	1.82	0.74	Tolerated
ADAM7	ENSOCUG00000012104	P>L	266	1.81	0.47	Tolerated
ADAM7	ENSOCUG00000012104	V>F	13	2.86	0.05	Potentially Functional
NUP205	ENSOCUG00000012757	N>S	17	3.47	0.4	Tolerated
SIK2	ENSOCUG00000012915	N>S	69	2.65	1	Tolerated
SIK2	ENSOCUG00000012915	I>V	70	2.65	0.3	Tolerated
ADAM9	ENSOCUG00000013380	L>F	59	2.24	0.08	Tolerated
ADAM9	ENSOCUG00000013380	V>M	60	2.24	0.88	Tolerated
ADAM9	ENSOCUG00000013380	E>V	17	2.61	0.62	Tolerated
-	ENSOCUG00000013917	V>L	6	3.34	0.34	Tolerated
-	ENSOCUG00000013917	H>N	6	3.34	0.31	Tolerated
-	ENSOCUG00000013917	R>K	6	3.34	1	Tolerated
-	ENSOCUG00000013917	H>N	6	3.34	1	Tolerated
-	ENSOCUG00000013917	I>V	6	3.34	0.45	Tolerated
-	ENSOCUG00000013917	I>V	7	3.32	0.66	Tolerated
-	ENSOCUG00000013917	H>Q	7	3.32	0.61	Tolerated
-	ENSOCUG00000013917	V>M	5	3.4	0.02	Potentially Functional*
MSH6	ENSOCUG00000014615	E>D	27	3.2	0.79	Tolerated
MSH6	ENSOCUG00000014615	I>V	28	3.19	0.82	Tolerated
MSH6	ENSOCUG00000014615	K>Q	29	3.17	0.18	Tolerated
MSH6	ENSOCUG00000014615	T>N	30	3.17	0.06	Tolerated
MSH6	ENSOCUG00000014615	K>T	29	3.17	0.01	Potentially Functional
KIAA1109	ENSOCUG00000014811	V>I	9	3.78	1	Tolerated
C3orf20	ENSOCUG00000015577	T>S	37	2.74	1	Tolerated
C3orf20	ENSOCUG00000015577	E>D	34	2.74	0.01	Potentially Functional
C3orf20	ENSOCUG00000015577	M>I	31	2.76	0.67	Tolerated
C3orf20	ENSOCUG00000015577	T>I	32	2.75	0.95	Tolerated
ANXA4	ENSOCUG00000015796	M>T	20	3.57	1	Tolerated
ANXA4	ENSOCUG00000015796	E>D	21	3.57	1	Tolerated
ANXA4	ENSOCUG00000015796	M>V	21	3.57	0.31	Tolerated
TXLNB	ENSOCUG00000016222	S>T	42	2.9	1	Tolerated
IL12B	ENSOCUG00000016322	W>R	30	2.09	0.83	Tolerated
IL12B	ENSOCUG00000016322	R>K	29	2.14	0.9	Tolerated
ZNF106	ENSOCUG00000016382	N>S	18	3.84	0.86	Tolerated
ZNF106	ENSOCUG00000016382	V>G	18	3.84	0.6	Tolerated
ZNF106	ENSOCUG00000016382	A>M	19	3.88	0.02	Potentially Functional*
ZNF106	ENSOCUG00000016382	R>H	17	3.86	0.65	Tolerated
ZNF106	ENSOCUG00000016382	A>T	20	3.63	0.29	Tolerated
ZNF106	ENSOCUG00000016382	V>I	17	3.77	1	Tolerated
NEK1	ENSOCUG00000016756	R>K	105	2.4	0.77	Tolerated
NEK1	ENSOCUG00000016756	Y>H	29	3.12	0.64	Tolerated
NEK1	ENSOCUG00000016756	S>P	24	2.97	0.36	Tolerated
NEK1	ENSOCUG00000016756	M>I	35	2.63	0.06	Tolerated
NEK1	ENSOCUG00000016756	R>K	38	2.98	0.94	Tolerated
NEK1	ENSOCUG00000016756	V>M	37	4.32	0.04	Potentially Functional*
NEK1	ENSOCUG00000016756	I>V	26	3.08	0.29	Tolerated
NEK1	ENSOCUG00000016756	A>T	29	3.07	0.61	Tolerated
NEK1	ENSOCUG00000016756	D>N	29	3.07	0.12	Tolerated
NEK1	ENSOCUG00000016756	E>G	30	3.05	1	Tolerated
NEK1	ENSOCUG00000016756	R>H	27	3.11	0.27	Tolerated
NEK1	ENSOCUG00000016756	A>V	23	3.34	0.78	Tolerated
NEK1	ENSOCUG00000016756	H>R	67	2.81	0.01	Potentially Functional
NEK1	ENSOCUG00000016756	E>D	28	3.08	0.88	Tolerated
KANSL1L	ENSOCUG00000017001	R>L	39	2.75	0.47	Tolerated
KANSL1L	ENSOCUG00000017001	N>S	44	2.79	0.15	Tolerated
KANSL1L	ENSOCUG00000017001	A>T	38	2.69	0.73	Tolerated
KANSL1L	ENSOCUG00000017001	T>A	41	2.69	0.85	Tolerated
KANSL1L	ENSOCUG00000017001	L>V	42	2.64	1	Tolerated
KANSL1L	ENSOCUG00000017001	W>C	37	3.03	0.23	Tolerated
RIF1	ENSOCUG00000017435	A>T	45	2.56	1	Tolerated
RIF1	ENSOCUG00000017435	S>G	44	2.58	0.35	Tolerated
RIF1	ENSOCUG00000017435	N>S	46	2.55	0.81	Tolerated
RIF1	ENSOCUG00000017435	N>S	48	2.56	0.84	Tolerated
RIF1	ENSOCUG00000017435	C>S	46	2.58	0.44	Tolerated
RIF1	ENSOCUG00000017435	I>T	44	2.58	0.41	Tolerated
RIF1	ENSOCUG00000017435	S>N	42	2.65	0.79	Tolerated
RIF1	ENSOCUG00000017435	I>T	40	2.71	0.56	Tolerated
RIF1	ENSOCUG00000017435	V>I	45	2.56	0.52	Tolerated
RIF1	ENSOCUG00000017435	S>N	42	2.58	0.45	Tolerated
RIF1	ENSOCUG00000017435	I>V	46	2.56	0.38	Tolerated
RIF1	ENSOCUG00000017435	S>C	46	2.56	0.22	Tolerated
RIF1	ENSOCUG00000017435	T>A	46	2.56	0.79	Tolerated
RIF1	ENSOCUG00000017435	E>D	46	2.56	1	Tolerated
RIF1	ENSOCUG00000017435	L>P	46	2.58	0.31	Tolerated
RIF1	ENSOCUG00000017435	R>H	43	2.59	0.54	Tolerated
RIF1	ENSOCUG00000017435	T>N	38	2.84	0.1	Tolerated
RIF1	ENSOCUG00000017435	L>F	35	2.95	0.71	Tolerated
RIF1	ENSOCUG00000017435	D>N	41	2.76	0.17	Tolerated
RIF1	ENSOCUG00000017435	E>K	33	3.02	0.8	Tolerated
RIF1	ENSOCUG00000017435	R>G	39	2.86	0.35	Tolerated
RIF1	ENSOCUG00000017435	S>F	36	2.98	0.7	Tolerated
RIF1	ENSOCUG00000017435	D>N	40	2.85	0.32	Tolerated
RIF1	ENSOCUG00000017435	D>E	43	2.62	1	Tolerated
LRRIQ1	ENSOCUG00000017527	Y>C	29	3.19	0.18	Tolerated
LRRIQ1	ENSOCUG00000017527	N>H	29	2.9	0.58	Tolerated
LRRIQ1	ENSOCUG00000017527	A>T	32	2.73	0.15	Tolerated
LRRIQ1	ENSOCUG00000017527	A>S	33	2.72	0.52	Tolerated
LRRIQ1	ENSOCUG00000017527	K>E	29	3.17	0.33	Tolerated
LRRIQ1	ENSOCUG00000017527	E>T	34	2.65	0.11	Tolerated
LRRIQ1	ENSOCUG00000017527	X>F	33	2.59	0.01	Potentially Functional
LRRIQ1	ENSOCUG00000017527	L>R	31	2.8	0.02	Potentially Functional
LRRIQ1	ENSOCUG00000017527	L>K	32	2.7	0.11	Tolerated
LRRIQ1	ENSOCUG00000017527	Q>R	29	2.88	0.05	Tolerated
LRRIQ1	ENSOCUG00000017527	X>I	6	3.44	0.35	Tolerated
LRRIQ1	ENSOCUG00000017527	M>I	29	3.1	0.41	Tolerated
LRRIQ1	ENSOCUG00000017527	E>D	33	2.68	0.46	Tolerated
LRRIQ1	ENSOCUG00000017527	H>R	32	2.79	0.47	Tolerated
LRRIQ1	ENSOCUG00000017527	P>T	34	2.63	1	Tolerated
LRRIQ1	ENSOCUG00000017527	N>V	34	2.63	0.04	Potentially Functional
LRRIQ1	ENSOCUG00000017527	C>G	30	2.65	1	Tolerated
UGGT2	ENSOCUG00000017627	V>M	31	2.63	0.07	Tolerated
UGGT2	ENSOCUG00000017627	C>L	31	2.64	0	Potentially Functional
UGGT2	ENSOCUG00000017627	Y>M	31	2.64	0.04	Potentially Functional
UGGT2	ENSOCUG00000017627	V>I	34	2.65	0.64	Tolerated
UGGT2	ENSOCUG00000017627	A>T	34	2.65	0.14	Tolerated
UGGT2	ENSOCUG00000017627	T>A	33	2.66	0.03	Potentially Functional
UGGT2	ENSOCUG00000017627	Y>H	32	2.7	0.74	Tolerated
UGGT2	ENSOCUG00000017627	N>S	29	2.73	1	Tolerated
UGGT2	ENSOCUG00000017627	I>V	31	2.73	0.76	Tolerated
UGGT2	ENSOCUG00000017627	V>I	24	3.37	0.61	Tolerated
UGGT2	ENSOCUG00000017627	P>H	29	2.78	0.56	Tolerated
UGGT2	ENSOCUG00000017627	T>N	26	2.85	0.99	Tolerated
UGGT2	ENSOCUG00000017627	R>K	26	2.85	1	Tolerated
E230025N22Rik‡	ENSOCUG00000021766	X>E	53	3.34	0	Potentially Functional*
E230025N22Rik‡	ENSOCUG00000021766	X>F	76	3.2	0.03	Potentially Functional
E230025N22Rik‡	ENSOCUG00000021766	I>T	84	3.21	0	Potentially Functional
E230025N22Rik‡	ENSOCUG00000021766	E>S	86	3.19	0.26	Tolerated
E230025N22Rik‡	ENSOCUG00000021766	S>M	90	3.2	0.01	Potentially Functional
E230025N22Rik‡	ENSOCUG00000021766	F>C	91	3.2	0.03	Potentially Functional
E230025N22Rik‡	ENSOCUG00000021766	I>G	90	3.19	0	Potentially Functional
Mb21d1‡	ENSOCUG00000021795	A>V	31	2.63	0.03	Potentially Functional
Mb21d1‡	ENSOCUG00000021795	E>K	31	2.63	0.51	Tolerated
Mb21d1‡	ENSOCUG00000021795	A>T	31	2.63	0.13	Tolerated
Mb21d1‡	ENSOCUG00000021795	K>R	31	2.63	0.86	Tolerated
Mb21d1‡	ENSOCUG00000021795	R>K	29	2.65	1	Tolerated
Mb21d1‡	ENSOCUG00000021795	Q>K	28	2.64	0.19	Tolerated
Mb21d1‡	ENSOCUG00000021795	G>E	29	2.64	0.65	Tolerated
Mb21d1‡	ENSOCUG00000021795	Q>E	27	2.68	1	Tolerated
Mb21d1‡	ENSOCUG00000021795	A>E	26	2.68	1	Tolerated
-	ENSOCUG00000022616	V>A	4	4.32	0.78	Tolerated
-	ENSOCUG00000022616	Q>H	5	4.32	0.02	Potentially Functional*
Abca14‡	ENSOCUG00000023033	M>K	5	3.66	0	Potentially Functional*
Abca14‡	ENSOCUG00000023033	R>H	6	3.66	0.3	Tolerated
Abca14‡	ENSOCUG00000023033	P>R	7	3.61	0.38	Tolerated
Abca14‡	ENSOCUG00000023033	M>I	7	3.61	0.11	Tolerated
Abca14‡	ENSOCUG00000023033	A>V	7	3.61	0.18	Tolerated
Abca14‡	ENSOCUG00000023033	E>K	7	3.61	0.71	Tolerated
Abca14‡	ENSOCUG00000023033	K>N	7	3.61	0.03	Potentially Functional*
Abca14‡	ENSOCUG00000023033	P>T	7	3.61	0.79	Tolerated
Abca14‡	ENSOCUG00000023033	K>Q	7	3.61	0.21	Tolerated
Abca14‡	ENSOCUG00000023033	A>T	7	3.61	0.37	Tolerated
Abca14‡	ENSOCUG00000023033	A>G	7	3.61	0.12	Tolerated
Abca14‡	ENSOCUG00000023033	V>I	7	3.61	1	Tolerated
Abca14‡	ENSOCUG00000023033	K>R	6	3.6	0.13	Tolerated
Abca14‡	ENSOCUG00000023033	K>E	6	3.6	0.28	Tolerated
Cyp2c44‡	ENSOCUG00000024354	A>P	349	2.01	0.02	Potentially Functional
Cyp2c44‡	ENSOCUG00000024354	T>S	382	2.21	0.9	Tolerated
Cyp2c44‡	ENSOCUG00000024354	F>L	275	2.09	0.14	Tolerated
Cyp2c44‡	ENSOCUG00000024354	M>T	391	2.21	0.41	Tolerated
Cyp2c44‡	ENSOCUG00000024354	I>V	392	2.21	0.6	Tolerated
COL28A1	ENSOCUG00000024805	N>I	5	4.32	0	Potentially Functional*
COL28A1	ENSOCUG00000024805	K>R	5	4.32	0	Potentially Functional*
COL28A1	ENSOCUG00000024805	D>A	5	4.32	0	Potentially Functional*
COL28A1	ENSOCUG00000024805	T>S	5	4.32	0.19	Tolerated
COL28A1	ENSOCUG00000024805	V>I	5	4.32	1	Tolerated
COL28A1	ENSOCUG00000024805	K>Q	5	4.32	0	Potentially Functional*
COL28A1	ENSOCUG00000024805	E>G	5	4.32	0	Potentially Functional*
COL28A1	ENSOCUG00000024805	G>R	3	4.32	0.33	Tolerated
COL28A1	ENSOCUG00000024805	E>K	3	4.32	1	Tolerated
SDHAF4	ENSOCUG00000025062	A>T	38	2.81	0.01	Potentially Functional
-	ENSOCUG00000025155	T>A	111	2.7	0.87	Tolerated

## Sheet: Table S8
Table S8. List of “mitonuc” genes with outlier frequencies of introgression (introgression frequency >= 85%).
Ensembl ID	Gene Name	Gene Description
ENSOCUG00000004871	RARS2	arginyl-tRNA synthetase 2, mitochondrial
ENSOCUG00000025062	SDHAF4	succinate dehydrogenase complex assembly factor 4
ENSOCUG00000001408	TYMP	thymidine phosphorylase
ENSOCUG00000008669	TMLHE	trimethyllysine hydroxylase, epsilon
ENSOCUG00000011422	L2HGDH	L-2-hydroxyglutarate dehydrogenase
ENSOCUG00000013358	ATG5	autophagy related 5

## Sheet: Table S9
Table S9. List of “mitonuc” genes with geographic patterns similar to that of mtDNA (introgression frequency = 0% in the south and >= 20 % in the north).
Gene Ensembl ID	Gene Code	Gene Description
ENSOCUG00000009899	NDUFV2	NADH:ubiquinone oxidoreductase core subunit V2
ENSOCUG00000007809	-	-
ENSOCUG00000016189	MRPL13	mitochondrial ribosomal protein L13
ENSOCUG00000002683	TUFM	Tu translation elongation factor, mitochondrial
ENSOCUG00000006446	CBR4	carbonyl reductase 4
ENSOCUG00000006904	DCAKD	dephospho-CoA kinase domain containing
ENSOCUG00000007893	GPAM	glycerol-3-phosphate acyltransferase, mitochondrial
ENSOCUG00000008974	-	-
ENSOCUG00000009058	-	-
ENSOCUG00000011052	PITRM1	pitrilysin metallopeptidase 1
ENSOCUG00000012393	MCCC1	methylcrotonoyl-CoA carboxylase 1
ENSOCUG00000012449	HCLS1	hematopoietic cell-specific Lyn substrate 1
ENSOCUG00000013720	CLYBL	citrate lyase beta like
ENSOCUG00000014405	TFAM	transcription factor A, mitochondrial
ENSOCUG00000015344	HEBP1	heme binding protein 1
ENSOCUG00000016663	-	-
ENSOCUG00000027099	RPL34	ribosomal protein L34

## Sheet: Table S10
Table S10. Nonsynonymous mutations detected within mitonuc genes candidates to have co-introgressed with mitochondrial DNA and their potential functional impact inferred using SIFT. ‡Gene names were obtained from the ortholog gene in the mouse when gene names not available in the rabbit annotation. *Low confidence in this prediction due to low sequence diversity.
Gene Name	Ensembl ID	Aminoacid Mutation	Nb. sequences at pos.	Median sequence conservation	Score	Effect
HP‡	ENSOCUG00000009058	F>L	13	3.33	0.02	Potentially Functional*
HP‡	ENSOCUG00000009058	T>A	13	3.33	0.3	Tolerated
HP‡	ENSOCUG00000009058	Y>S	13	3.33	0.06	Tolerated
MCCC1	ENSOCUG00000012393	R>K	52	3.65	1	Tolerated

[truncated: 1 more sheets: Table S11]
